# Supplementary material for: Patient-Level Savings on Generic Drugs Through the Mark Cuban Cost Plus Drug Company
Source: PubMed Central journal article supplement (PMC11179122; doi:10.1001/jamahealthforum.2024.1468), 2024-06-14
Supplement: jamahealthforum-e241468-s002.pdf [file jamahealthforum-e241468-s002.pdf]

## Data Sharing Statement

Kouzy. Patient-Level Savings on Generic Drugs Through the Mark Cuban Cost Plus Drug Company. *JAMA Health Forum*. Published June 14, 2024.

doi:10.1001/jamahealthforum.2024.1468

### Data

**Data available:** Yes

**Data types:** Data (not involving human participants)

**How to access data:** Request for data can be made to [ebudmir@mdanderson.org](mailto:ebudmir@mdanderson.org)

**When available:** With publication

### Supporting Documents

**Document types:** None

### Additional Information

**Who can access the data:** Researchers with reasonable proposed use of data.

**Types of analyses:** For any purpose.

**Mechanisms of data availability:** With investigator support
